# Supplementary material
Source: MDPI journal article supplement (https://www.mdpi.com/2072-4292/10/1/43)
Supplement: s1 [file s1]

A New Method for Automatically Tracing Englacial Layers from MCoRDS data in NW Greenland†

Siting Xiong 1,*, Jan-Peter Muller 1 and Raquel Caro Carretero1，2

1 Imaging Group, Mullard Space Science Laboratory (MSSL), Department of Space & Climate Physics, University College London, Holmbury St Mary, Dorking, Surrey, RH5 6NT, UK; E-Mail: siting.xiong.14@ucl.ac.uk; j.muller@ucl.ac.uk

2 Universidad Pontificia Comillas, Madrid, Spain; rcaro@icai.comillas.edu


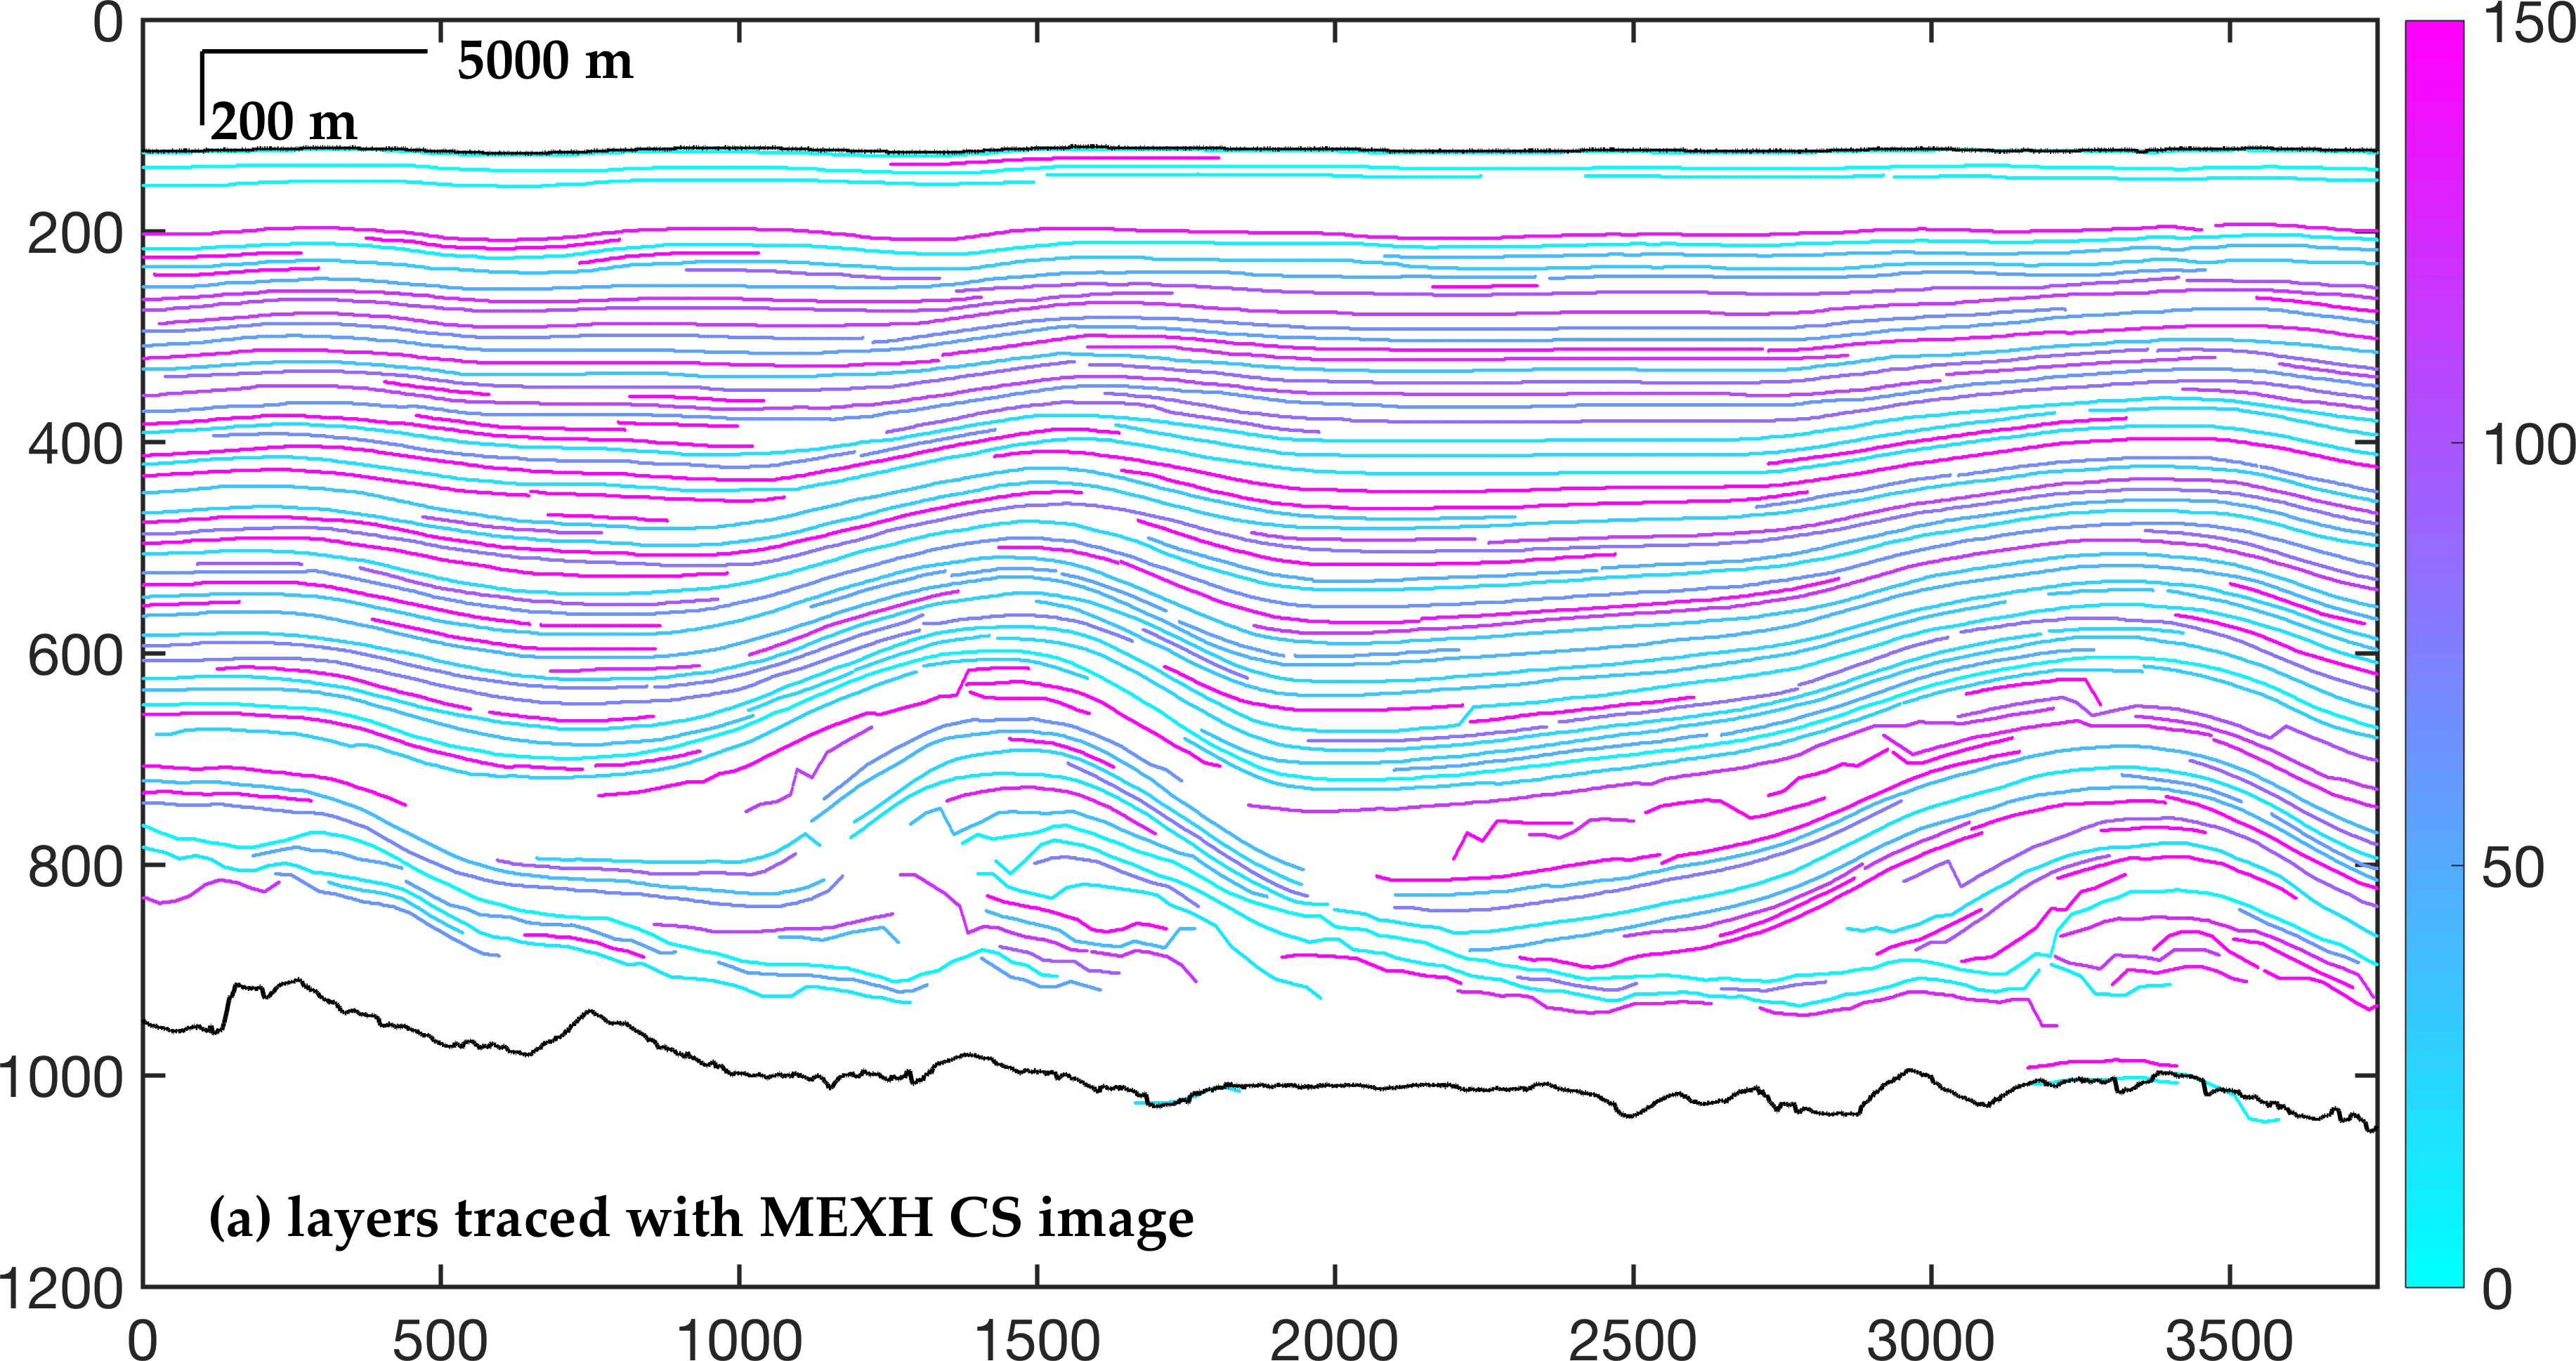


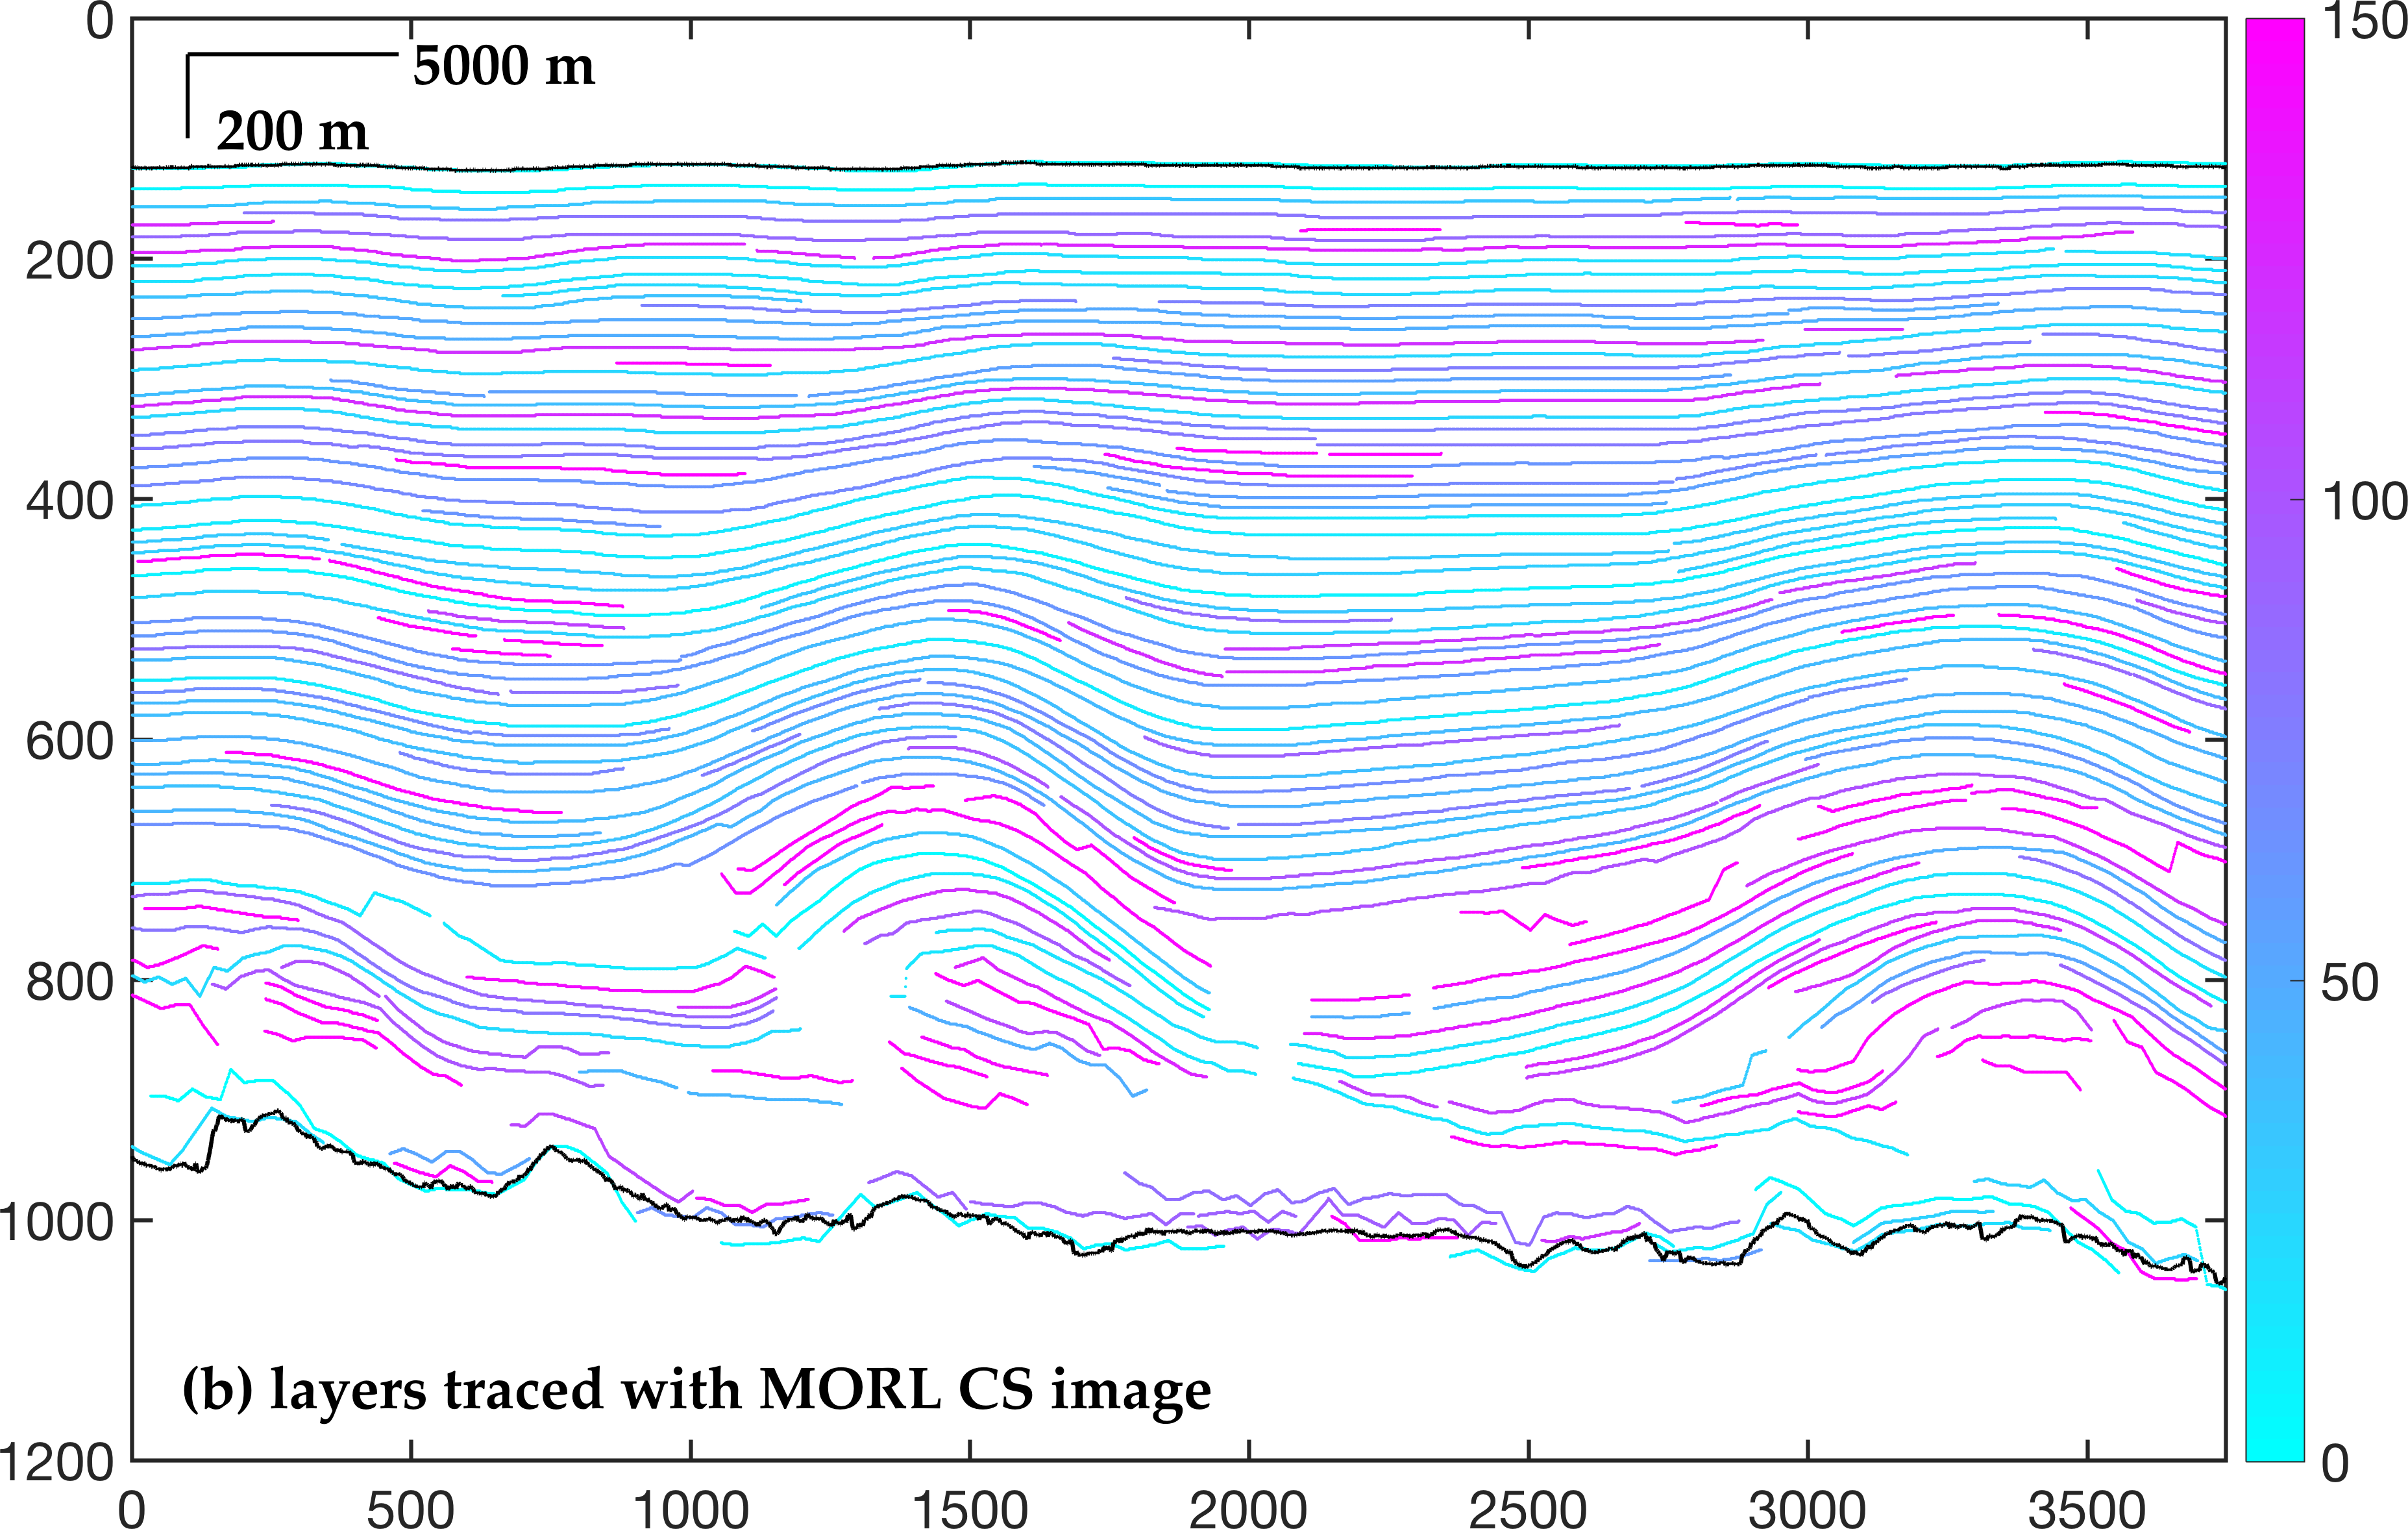


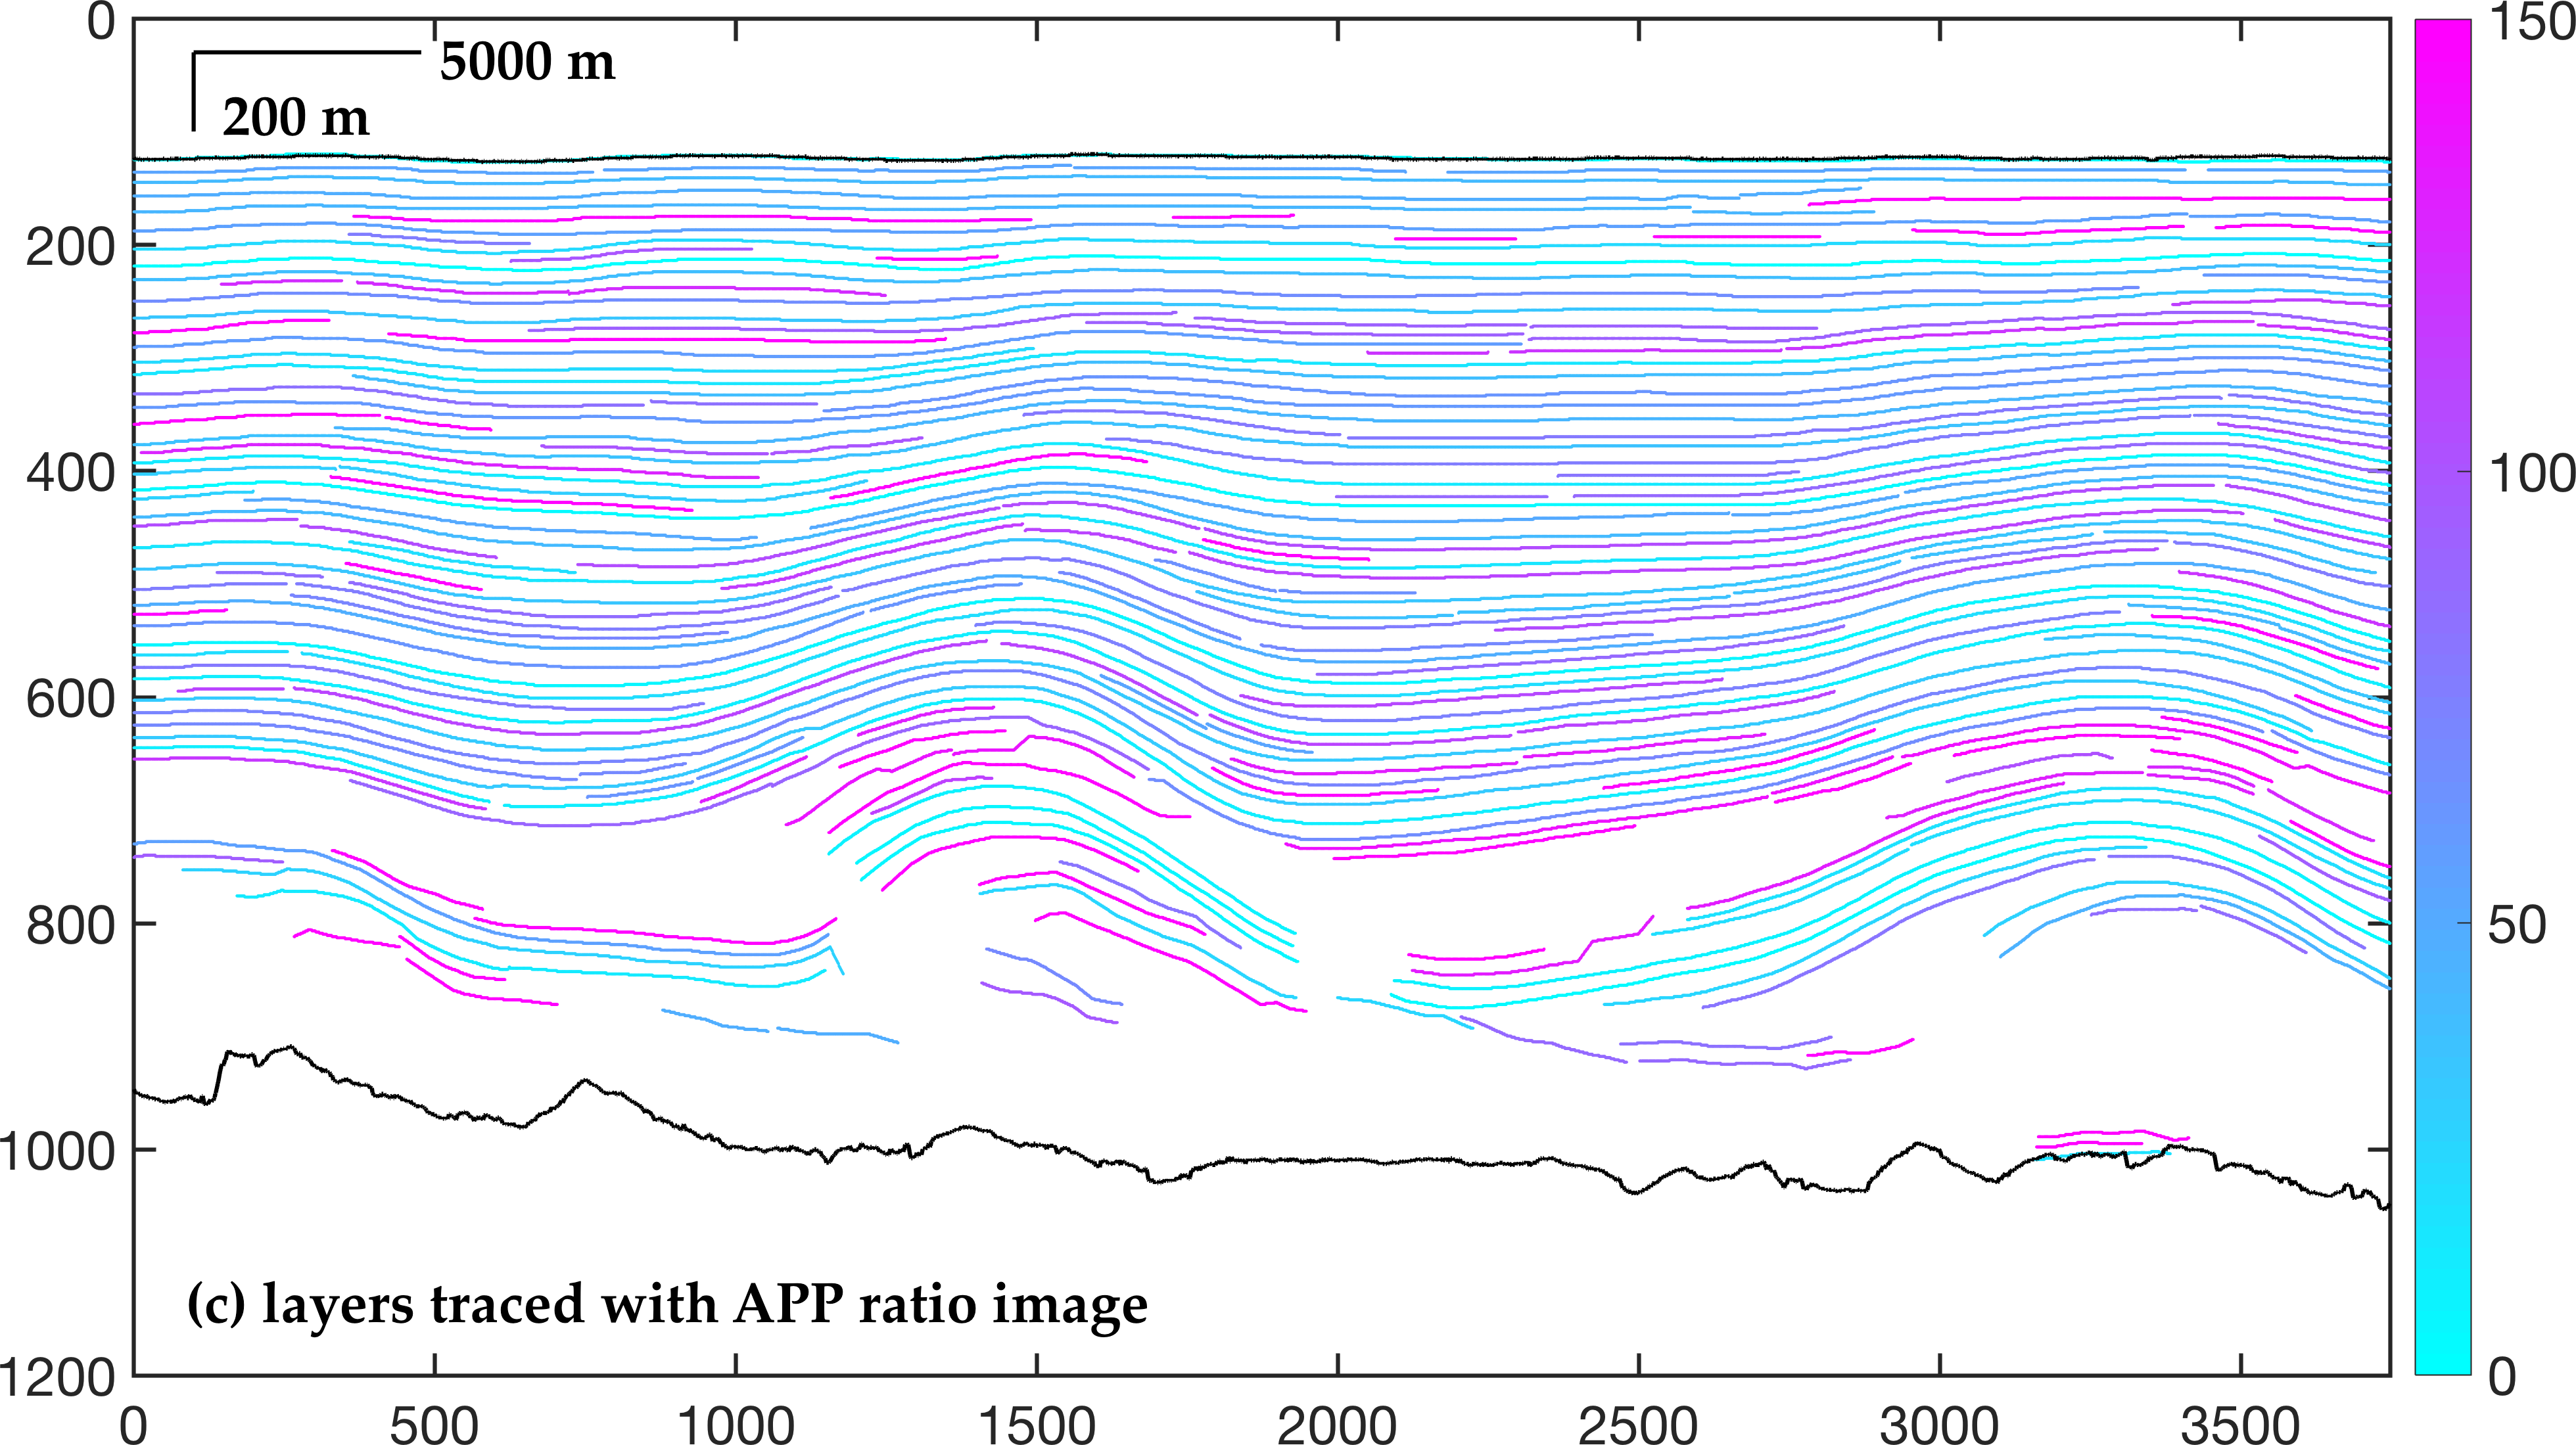


**Figure S1.** The outcome layers from layer-tracing procedures with inputs from the MEXH CS image, the MORL CS image and APP ratio image independently. Parameters for layer-tracing are a block size of 51 pixels, a maximum distance allowance of 7 pixels and a slope angle difference of 90° (MCoRDS data is 20110329_02_020).


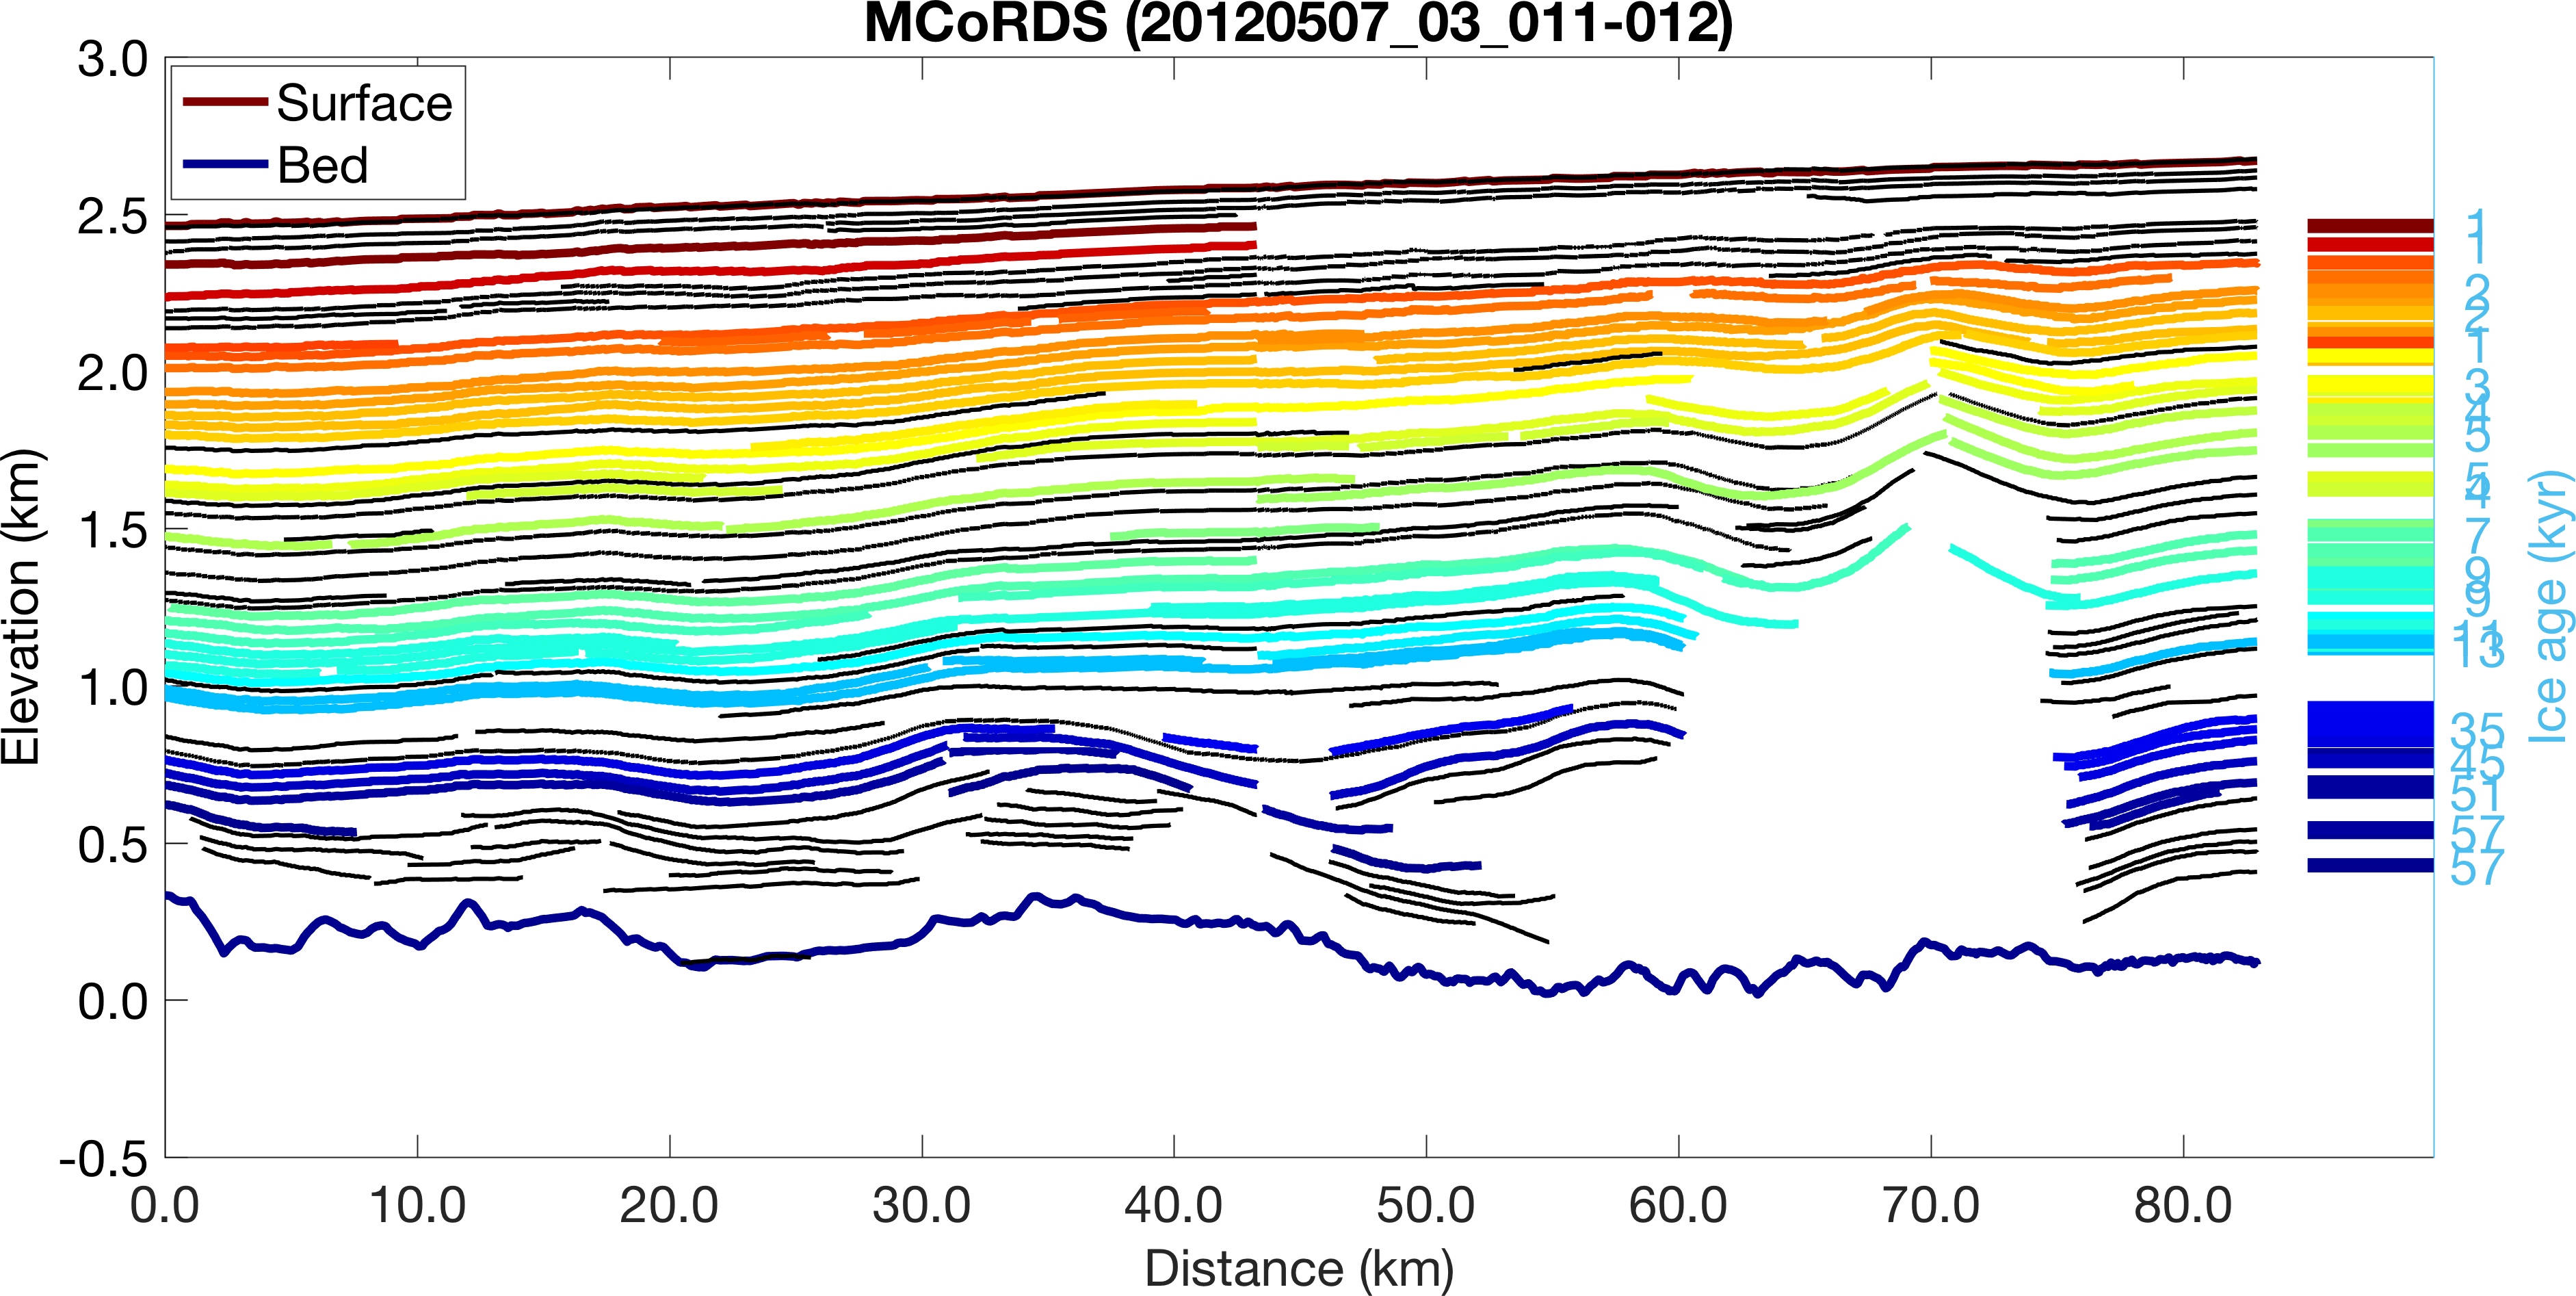


(**a**)


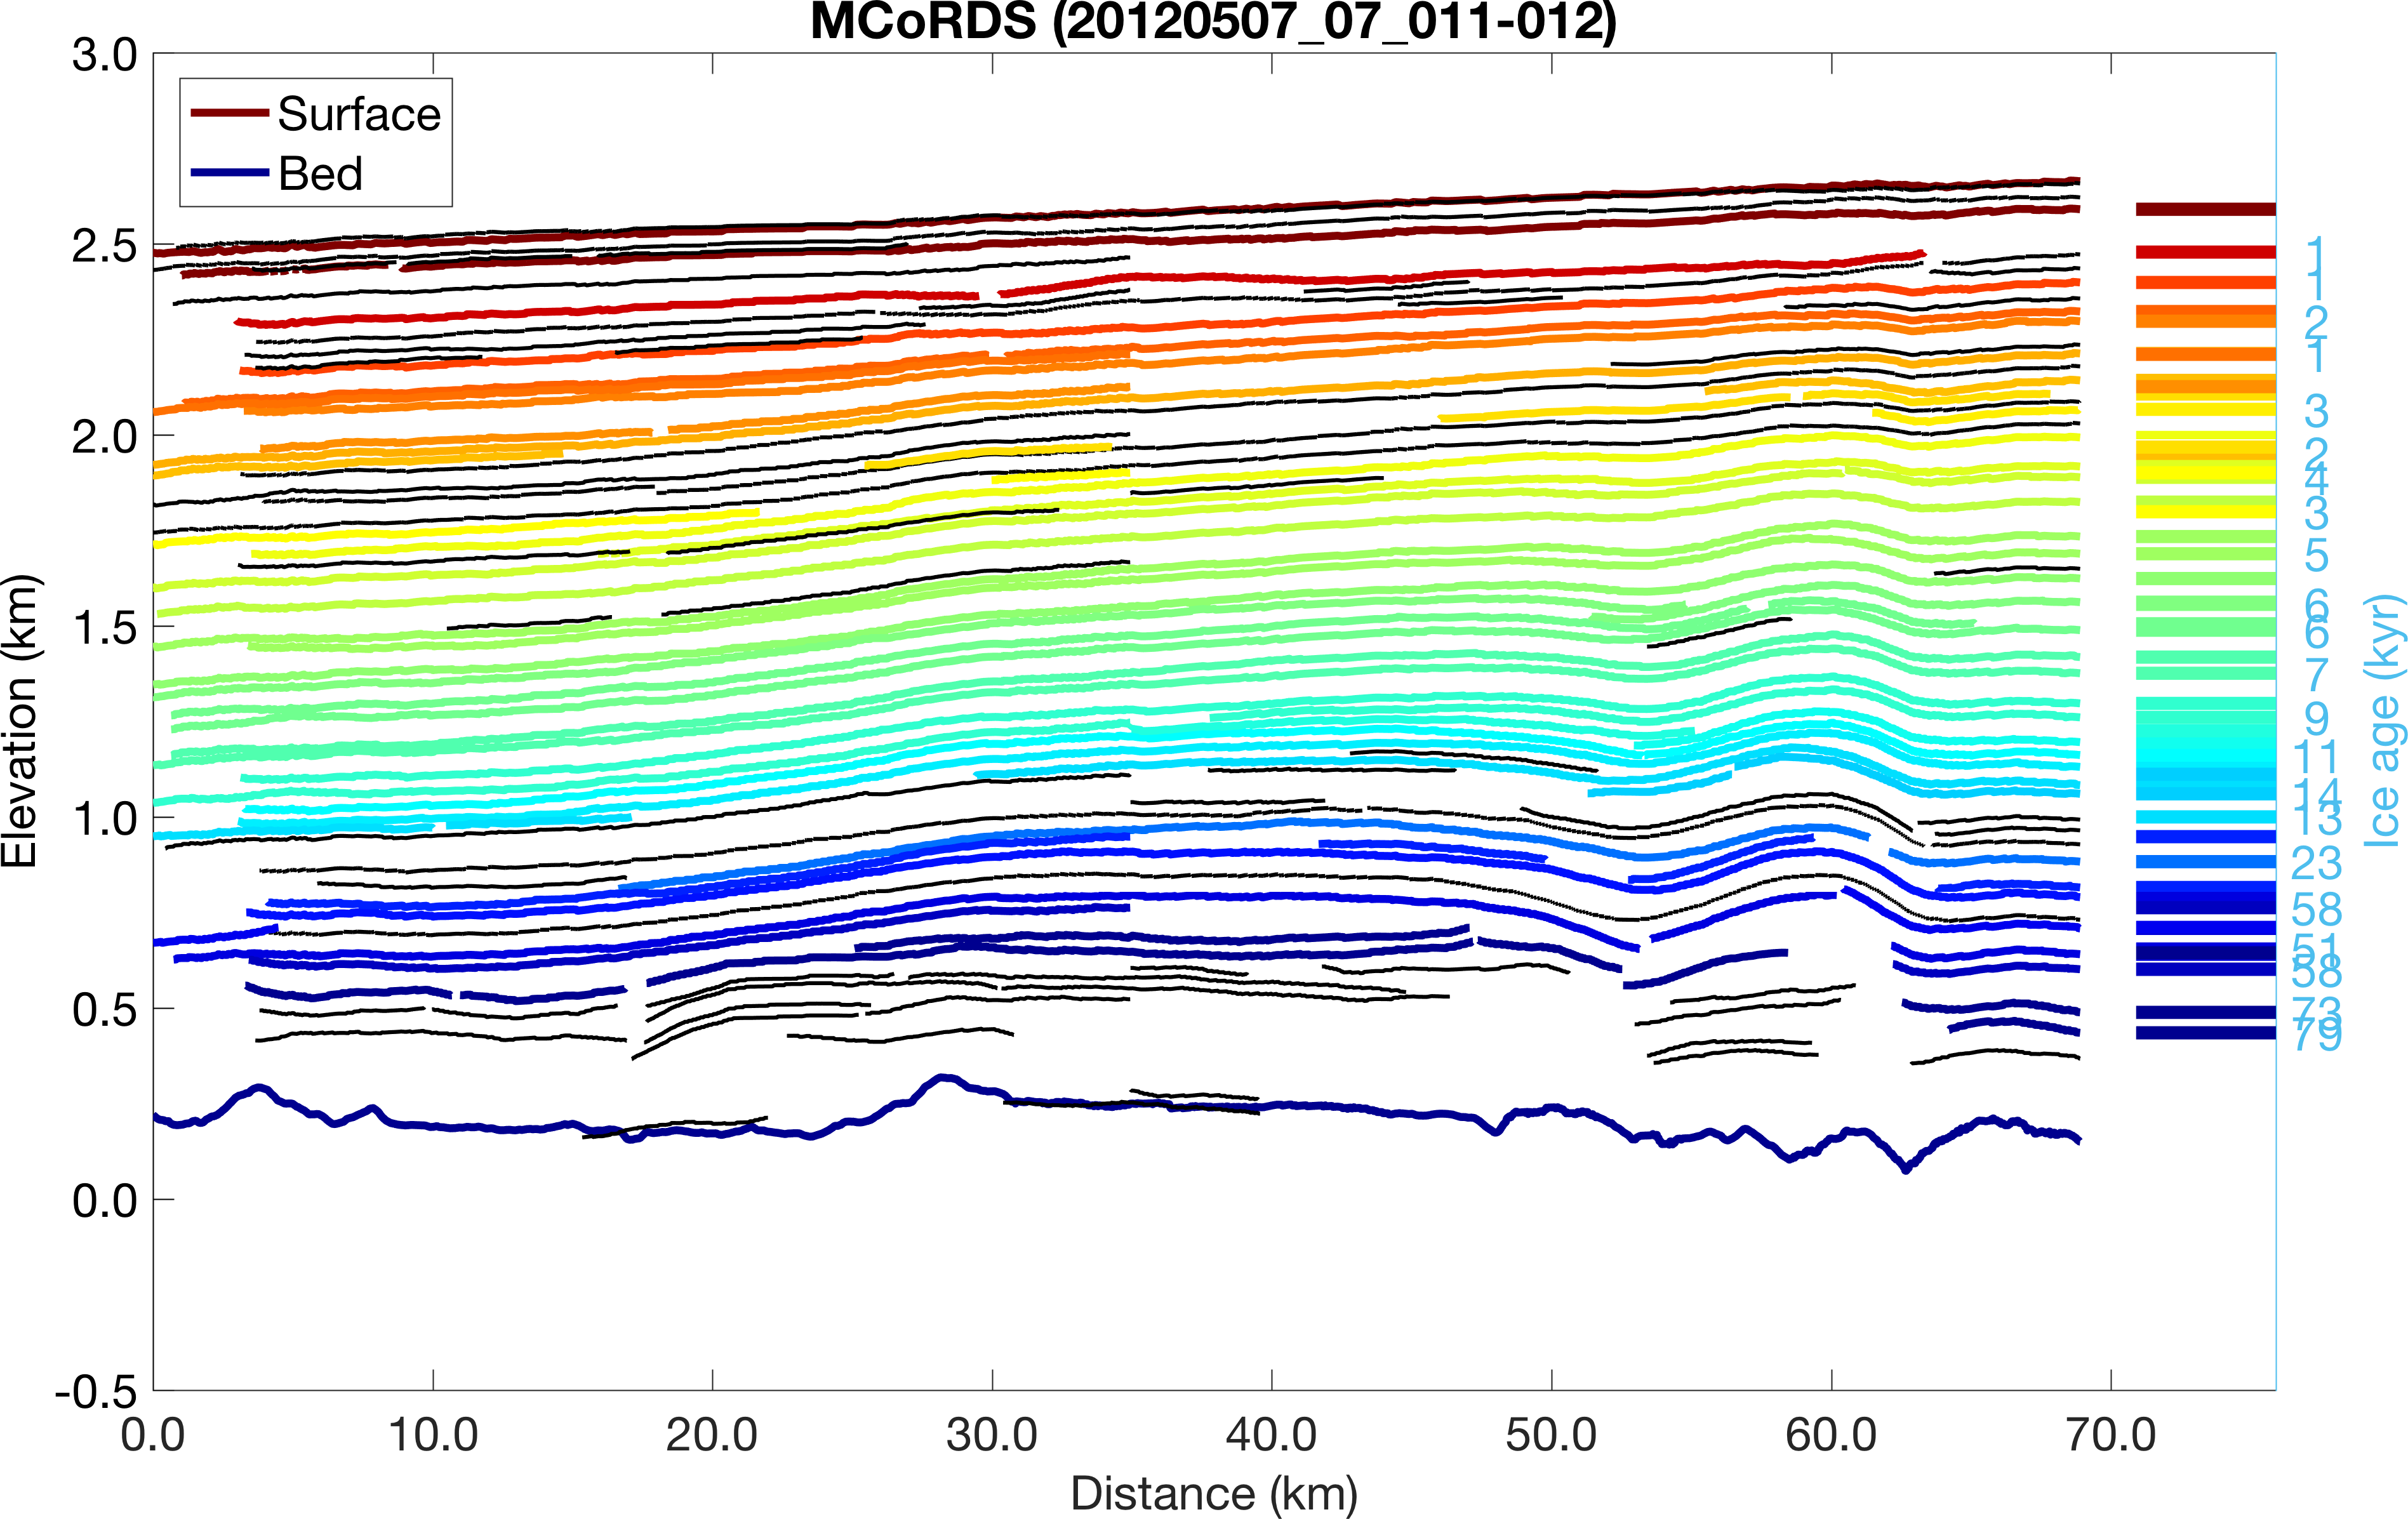


(**b**)


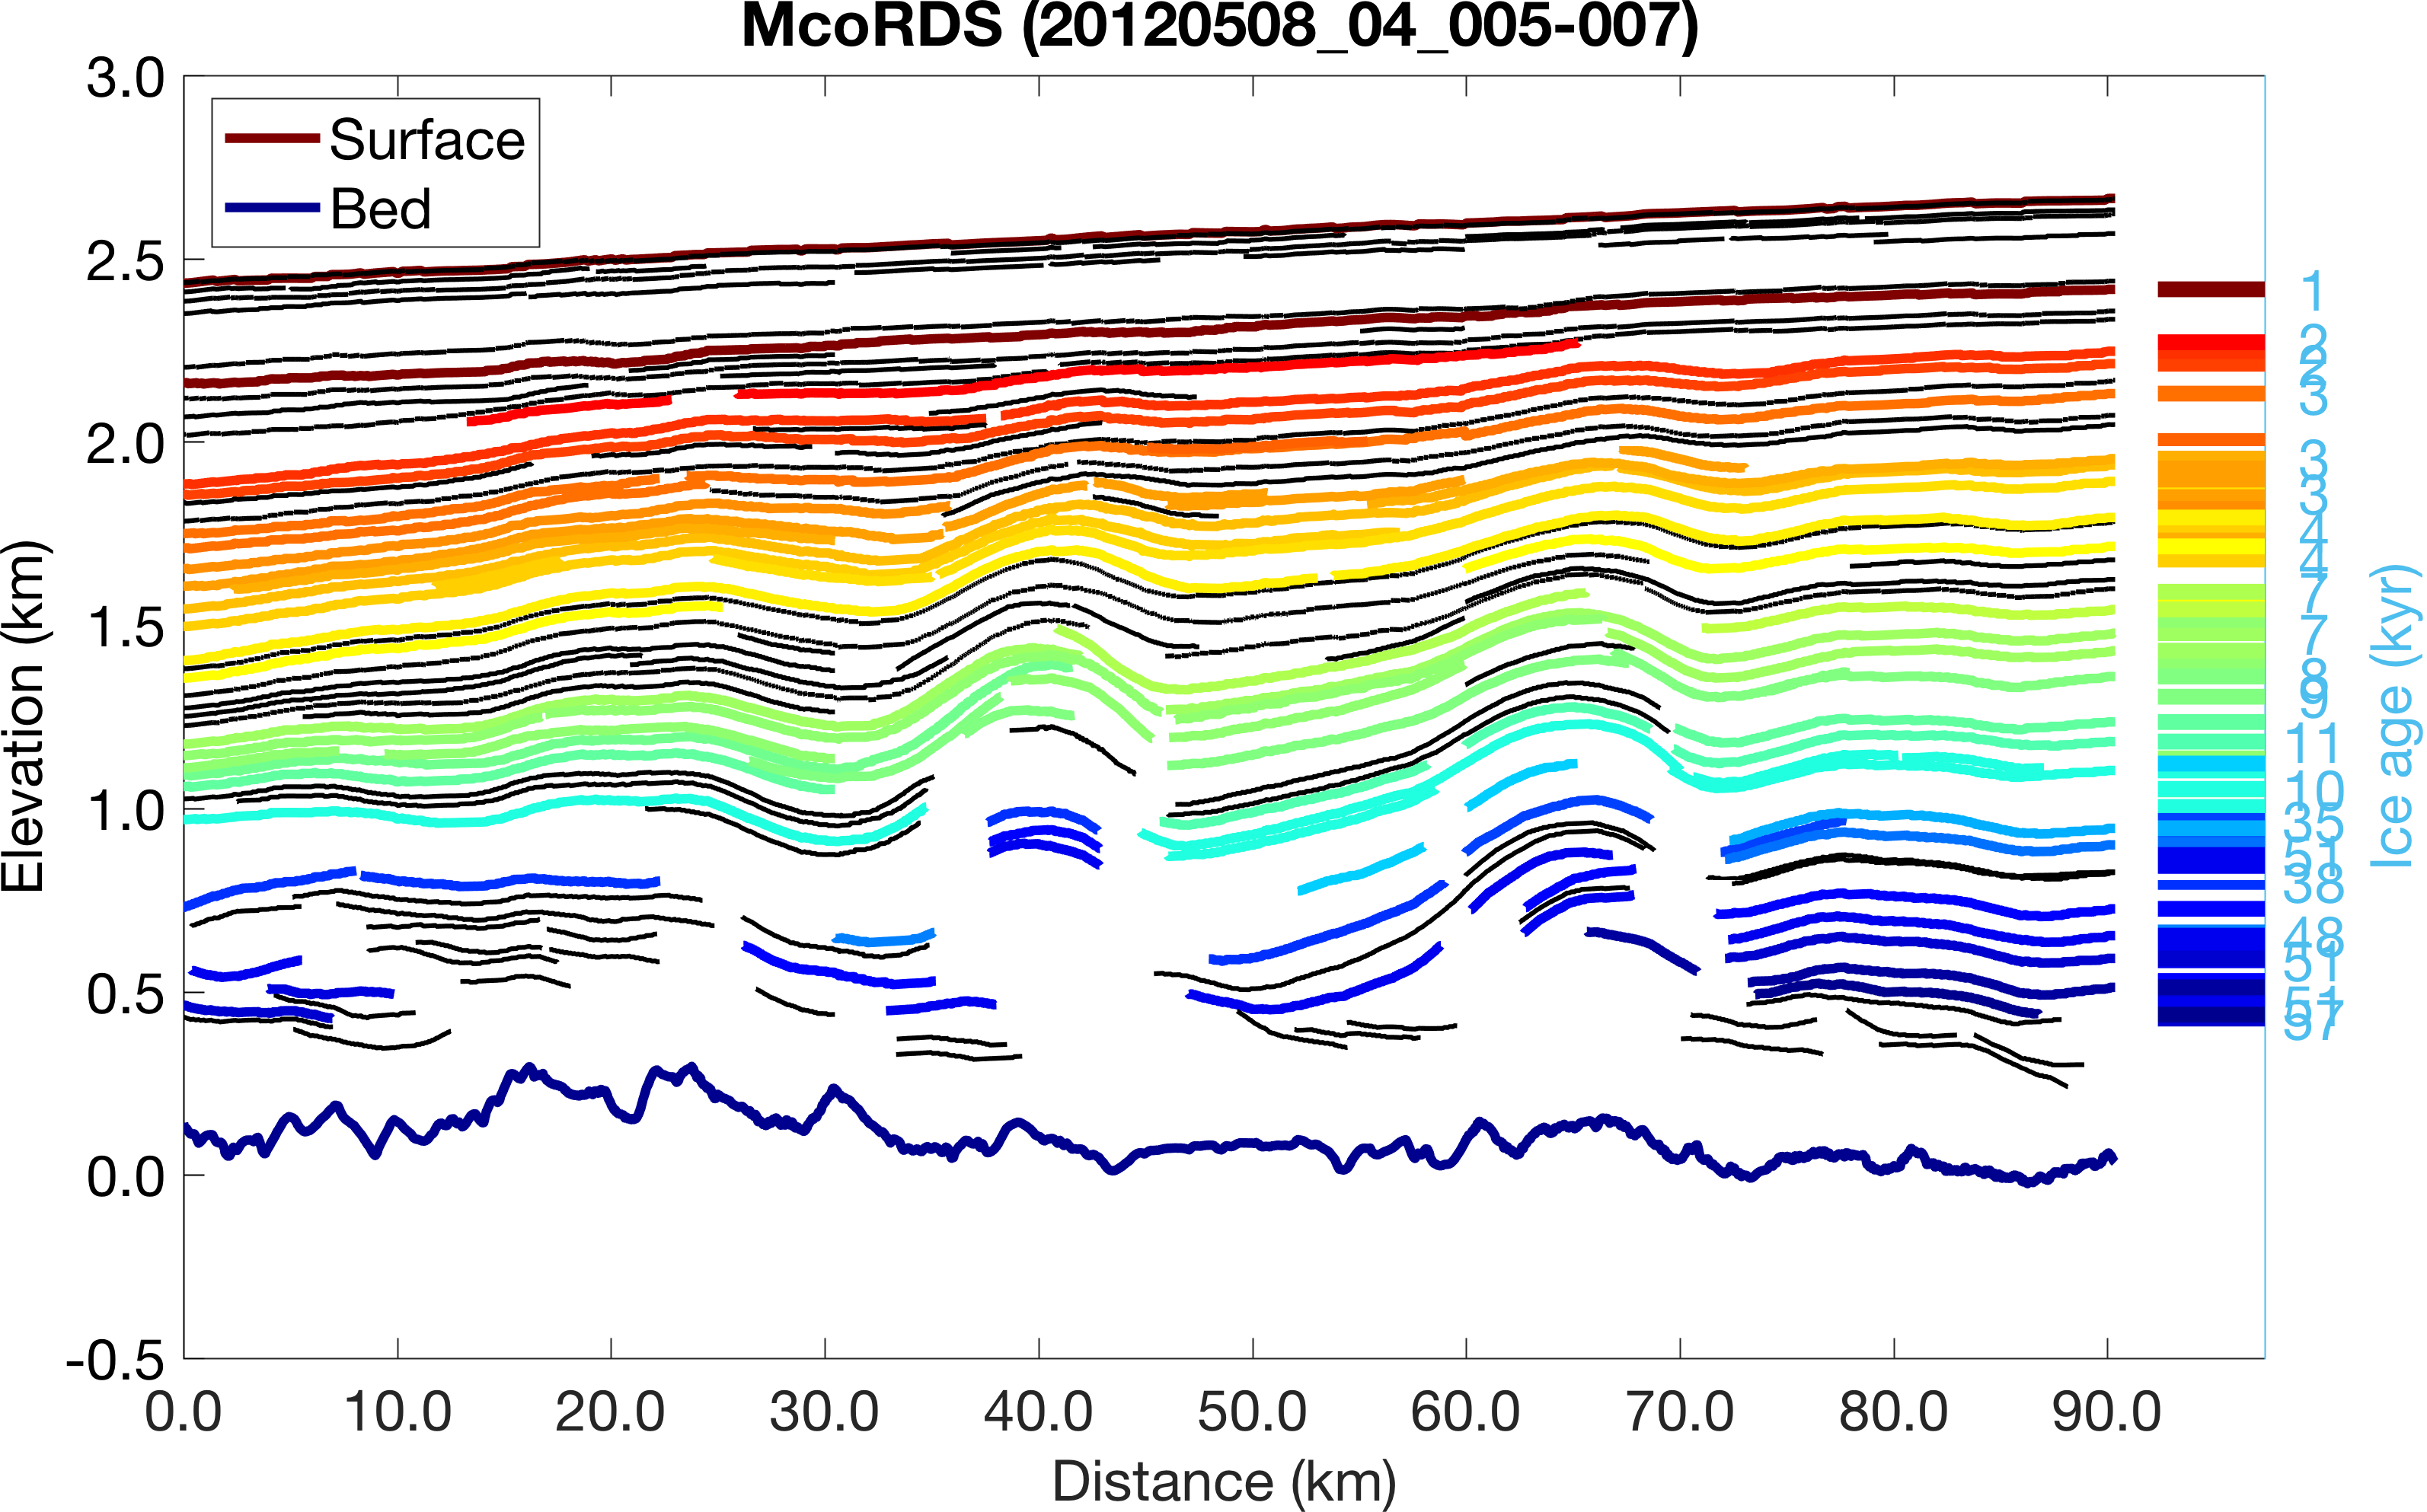


(**c**)


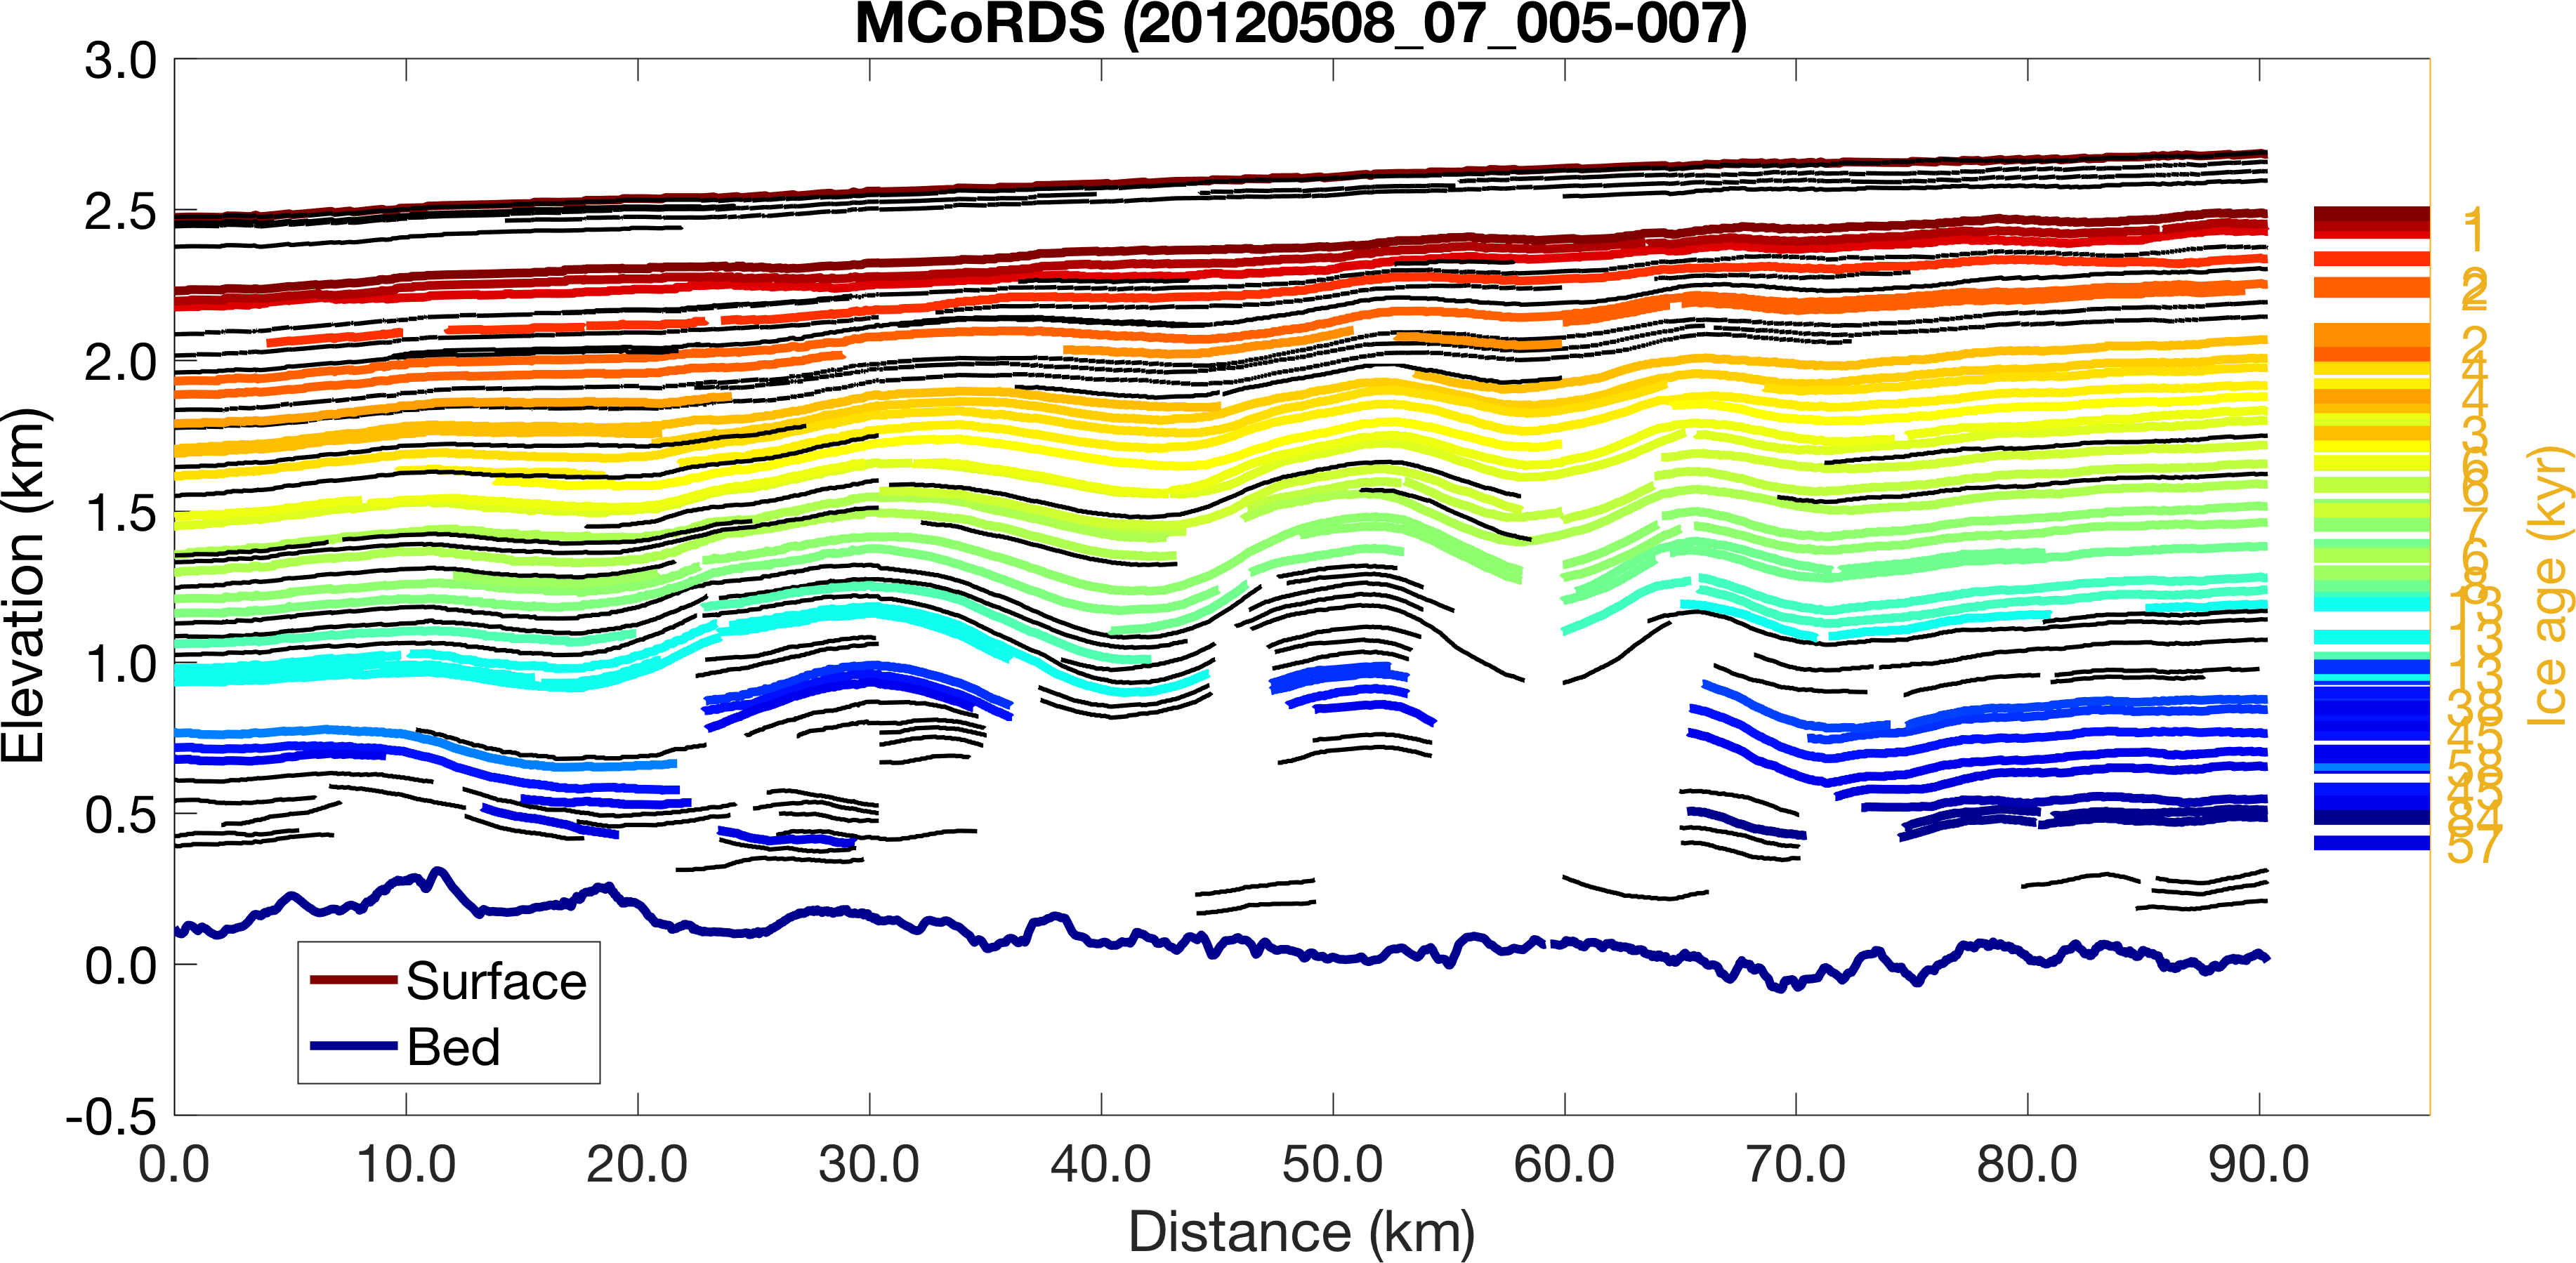


(**d**)


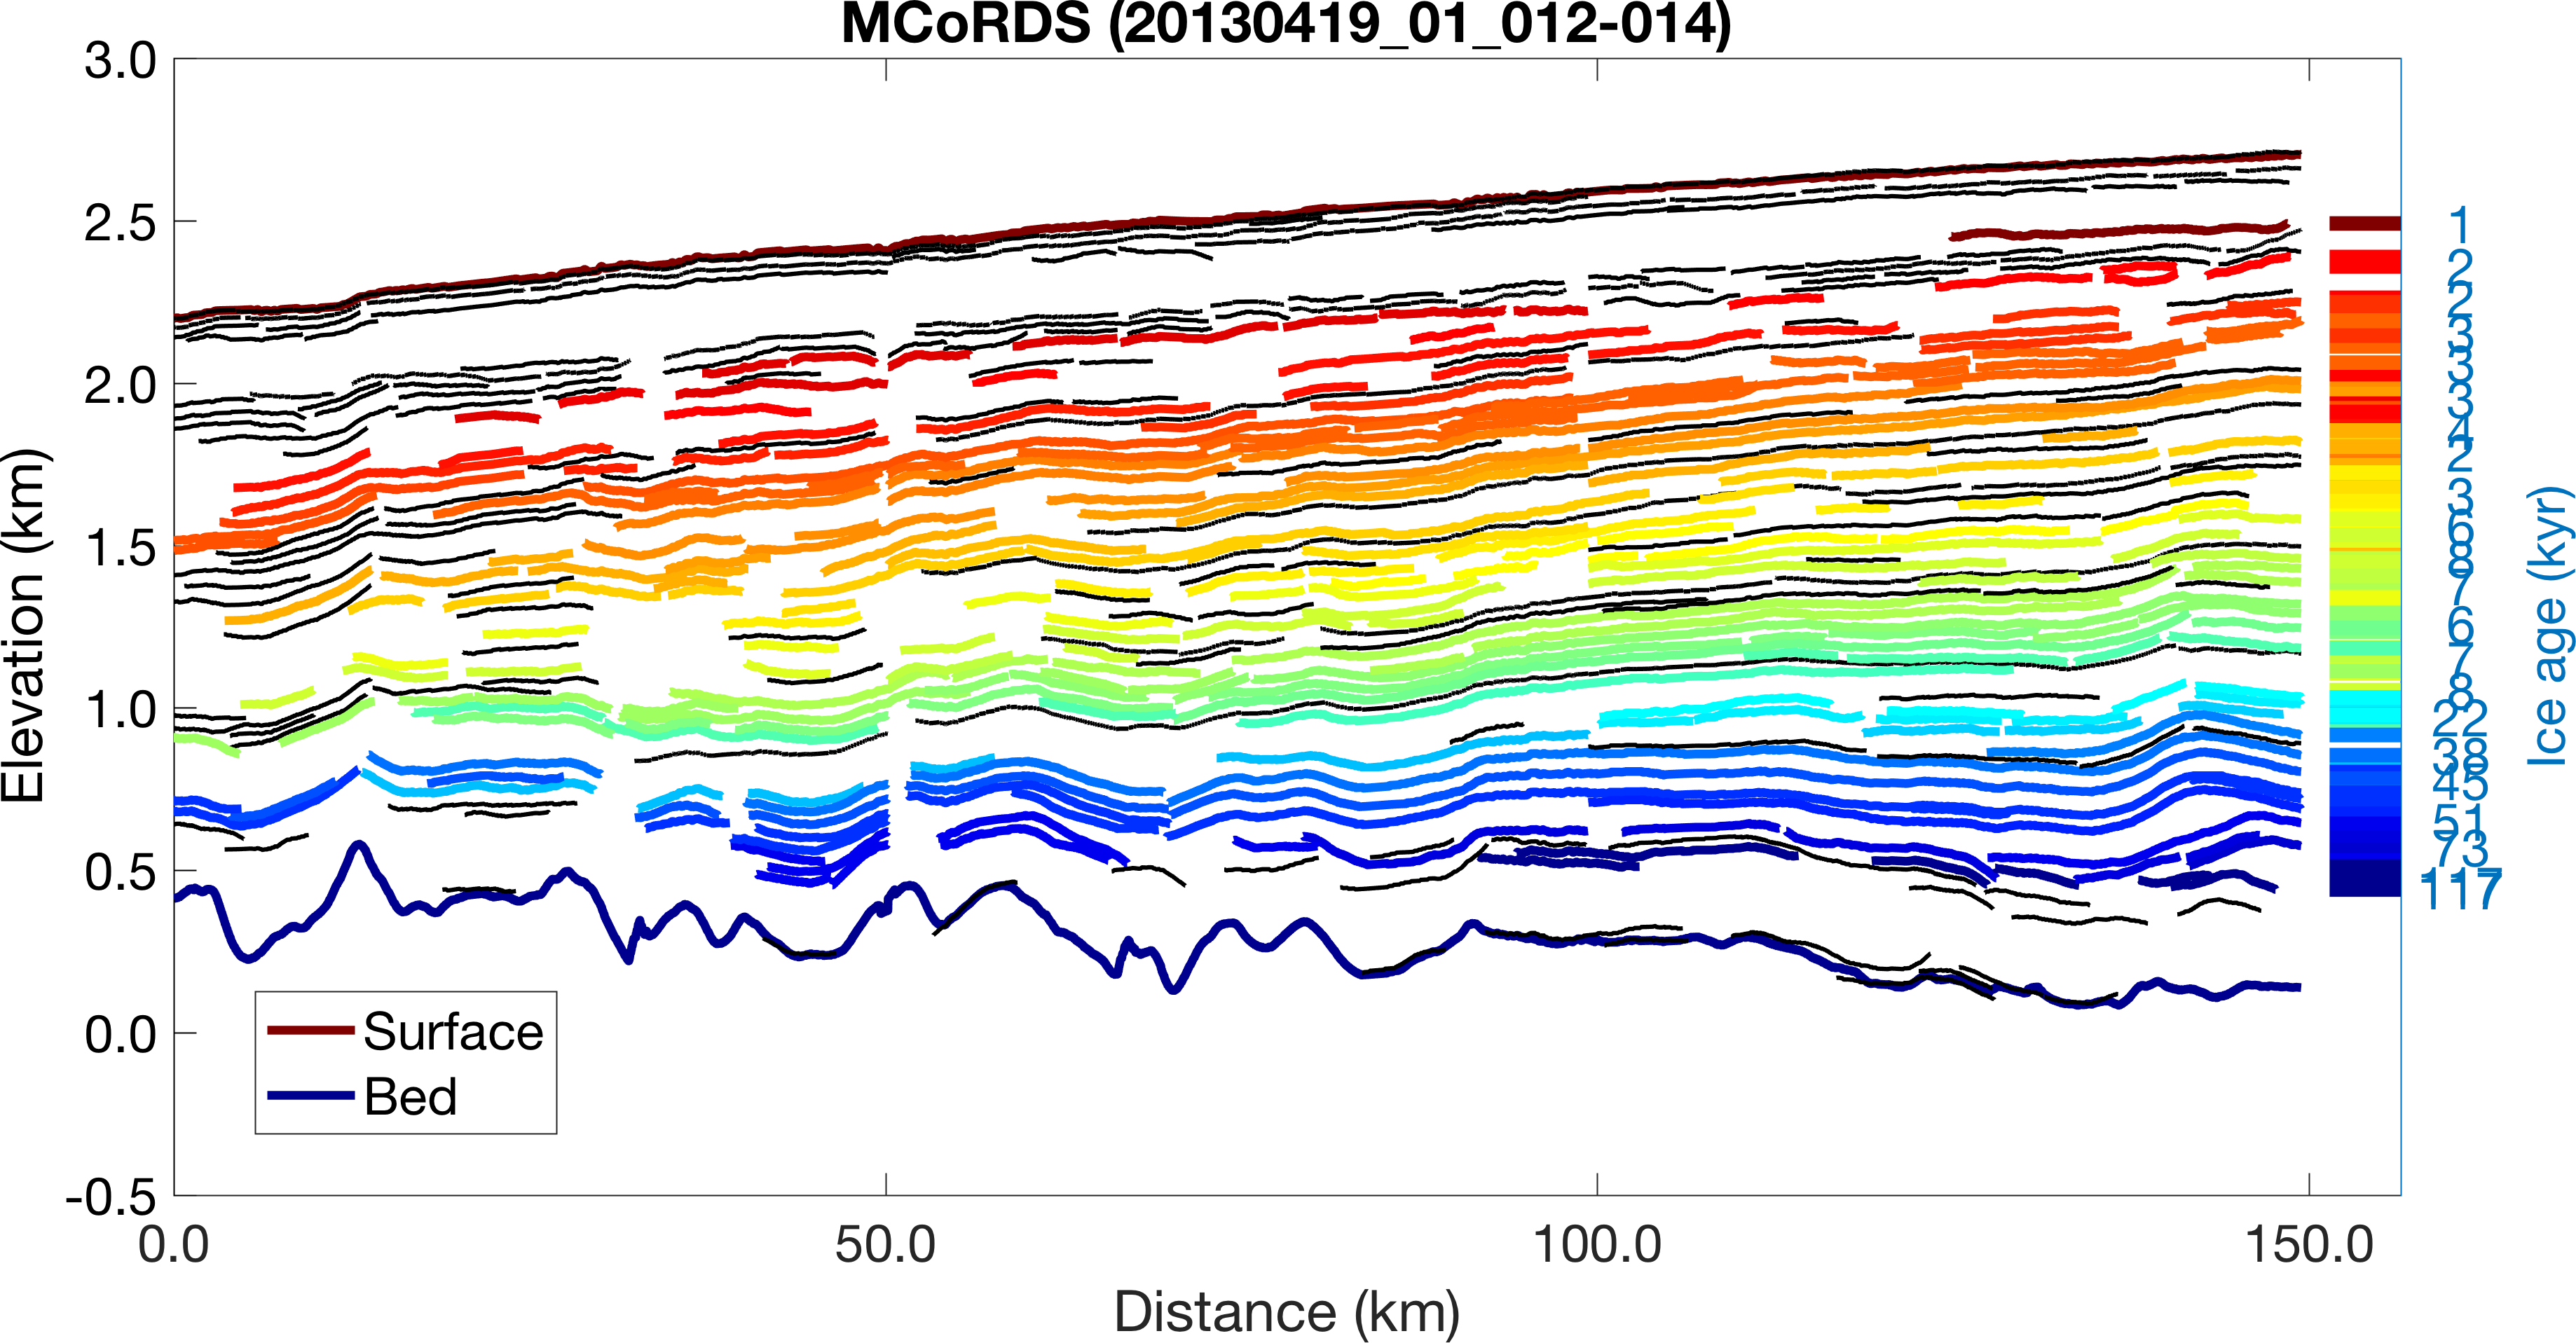


(**e**)


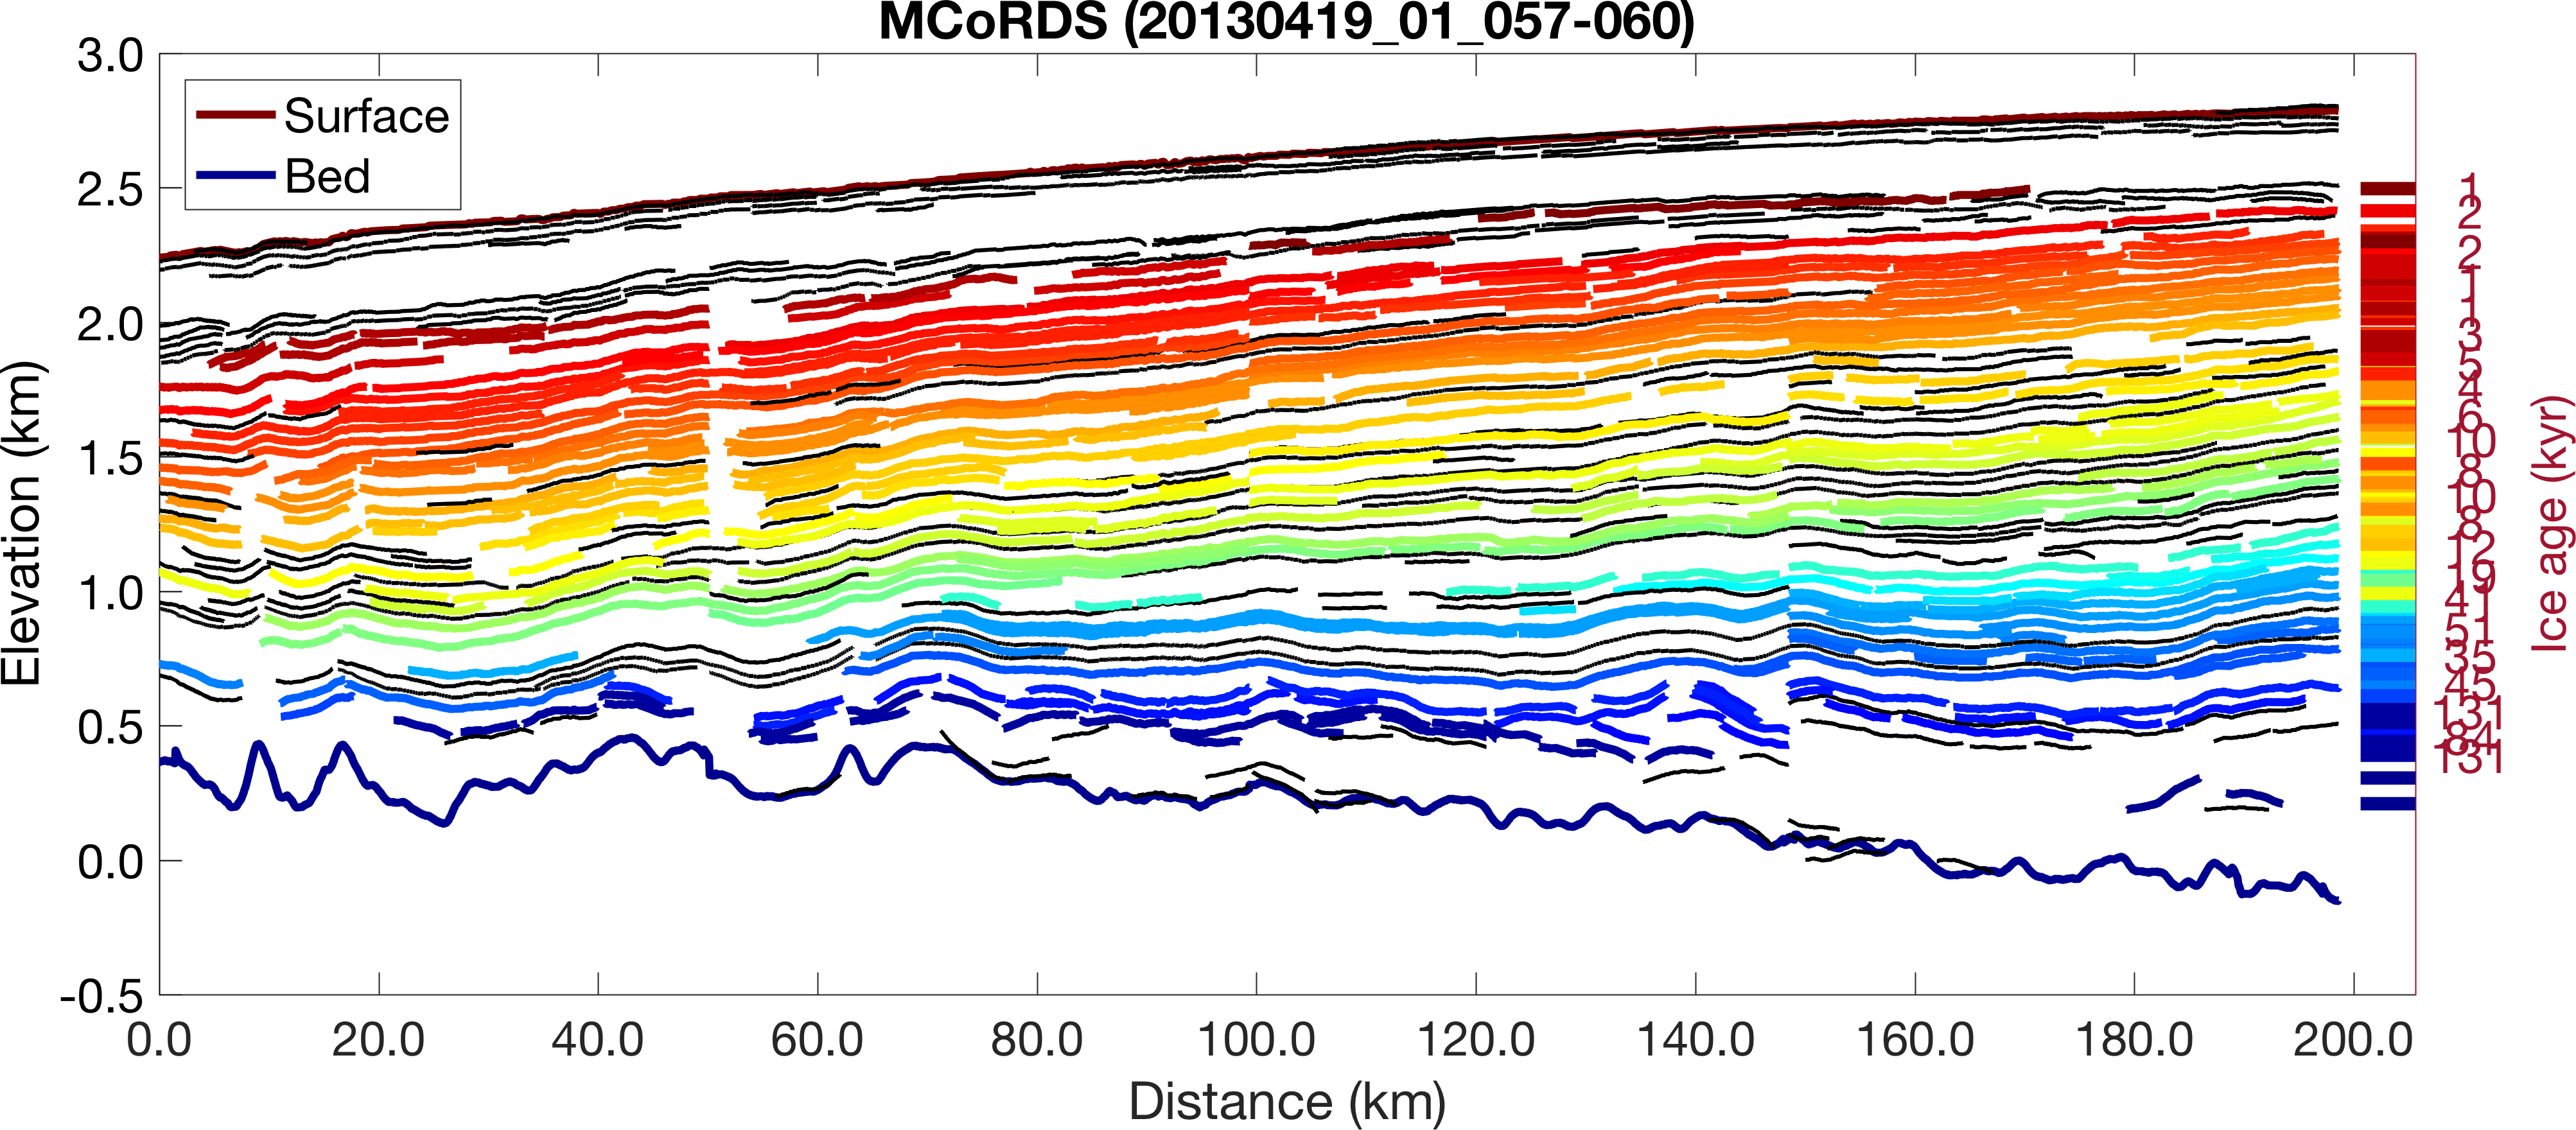


(**f**)

**Figure S2.** Comparison between the traced layers by using the proposed method and those in the RRRAG product.
